# Supplementary material
Source: PubMed Central journal article supplement (PMC2804171)
Supplement: supp_M109.068668_jbc.M109.068668-1.pdf [file supp_M109.068668_jbc.M109.068668-1.pdf]

## SUPPLEMENTAL DATA FIGURE LEGENDS

**Figure S1. Demethylating agent 5-aza induces MAP2 protein expression.** Immunostaining for MAP2 protein expression in 451Lu cells treated with 5-aza. Cells were seeded on glass coverslips and treated with 5-aza and after 72 hours of treatment cells were stained using anti-MAP2 antibody, followed by anti-mouse IgG-FITC and PI and photographed using confocal microscope.

**Figure S2.** Representative sequencing chromatogram of analyzed *MAP2* CpG island sequences of bisulfite-treated DNA of brain and 451Lu metastatic melanoma cells. CpG nucleotides numbers are given above of 3' proximal region.

**Figure S3. Completeness of the MAP2 promoter *in vitro* methylation.** *In vitro* methylated and unmethylated *MAP2* promoters were determined by methylation-sensitive (*HpaII*) and methylation-insensitive (*MspI*) restriction digestion. Agarose gel electrophoresis and ethidium bromide staining were used to analyze the enzyme digested DNA.

**Figure S4. Human melanoma cells exhibit neuronal differentiation.** (A) Immunofluorescence analysis of expression of neuronal marker proteins  $\beta$ -III-tubulin, synaptophysin and 70 kDa neurofilament protein in a panel of primary (WM35, WM115) and metastatic (SK-MEL-19, 451Lu and C22). Merged images with antibody staining in green or red and the DAPI stained nuclei (blue) are shown. (B) RT-PCR analysis of transcriptional factors involved in commitment to neuronal differentiation. Total RNA from undifferentiated neuroepithelial cells (NEC), teratocarcinoma cells (NT2/D1), normal primary neonatal human foreskin melanocytes (NMC), primary (WM35, WM115) and metastatic melanoma cells (amelanotic SK-MEL-2, -28, 451Lu and pigmented SK-MEL-19 and-22) was analyzed using primers and PCR conditions described in *Materials & Methods*.

**Figure S5. Mutant BRAF expression does not result in non-specific stimulation of gene promoters.** (A) Activities of catalase and human tyrosinase related protein 1 (*TYRP1*) promoters in vector control and mBRAF transfected 451Lu melanoma cells. Data shown are relative luciferase activity (RLA, mean  $\pm$ SEM, from triplicate wells in 2 independent experiments. (B) HES1 represses BRAF induced MAP2 promoter activity. 451Lu cells were co-transfected with MAP2.4 promoter plasmid, mBRAF expression plasmid and increasing amount of (150, 325, 650ng) of mouse Hes1 expression plasmid pCI-Hes1. Forty-eight hours after transfection luciferase activity was measured and data (mean  $\pm$ SEM,  $p < 0.001$ ) are represented as percent activity of the empty vector control.

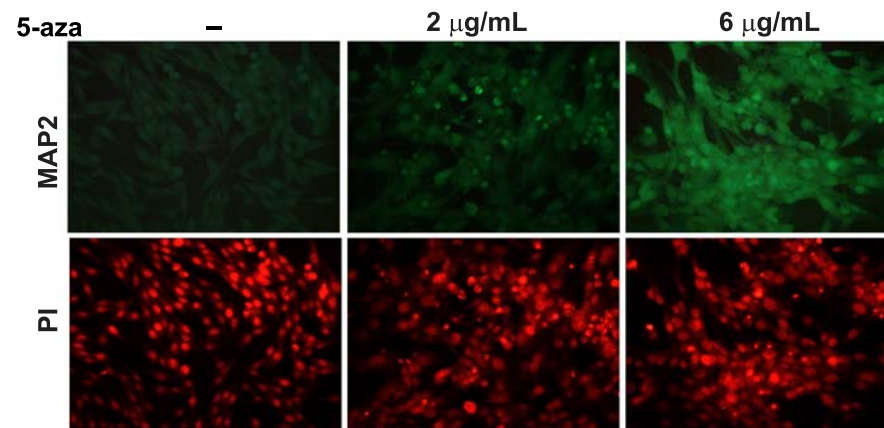

Figure S1.

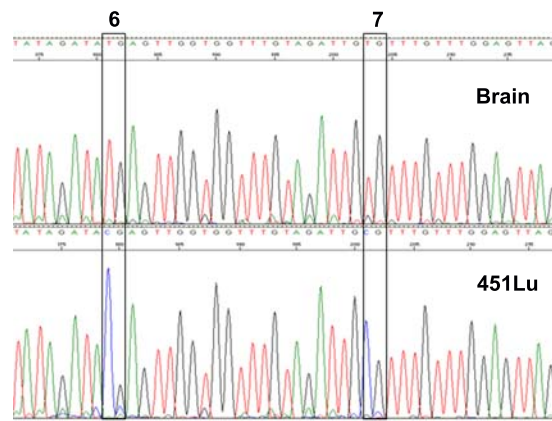

Figure S2

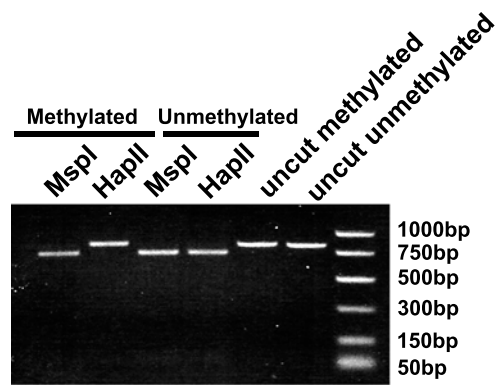

**Figure S3**

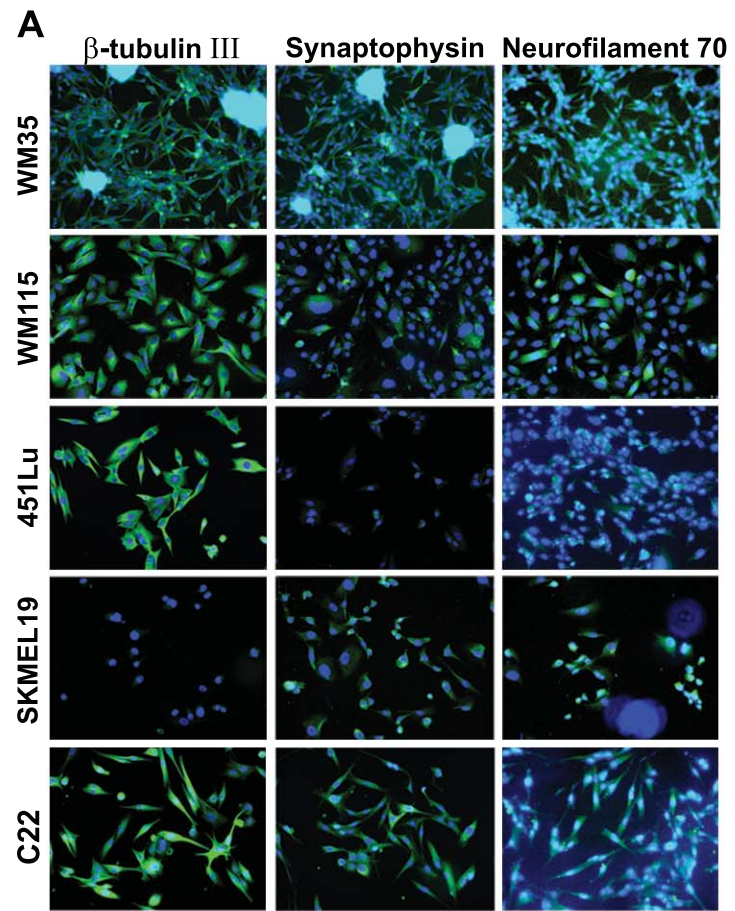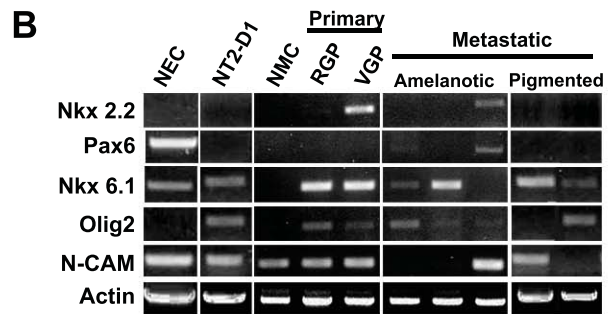

**Figure S4**

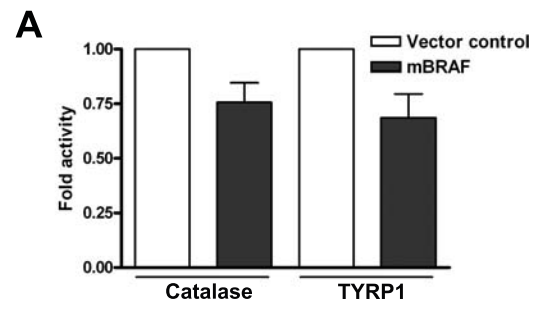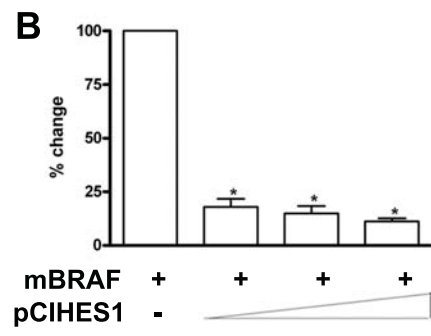

Figure S5
